# Supplementary material for: 200 Years of Caprimulgid Records in Southern Brazil: A Comparison between the Literature and Citizen Science Data
Source: MDPI journal article supplement (doi:10.3390/birds4040026), 2023-10-30
Supplement: s1 [file s1]

## Section S1

List of Caprimulgidae references used in this study. [reference(s)] year(s).

[1] 1938

[2,3] 1983-1989

[4–16] 1990-1999

[17–34] 2000-2009

[35–51] 2010-2019

[52–56] 2020-2021

1. Pinto, O.M. de O. *Catálogo Das Aves Do Brasil e Lista Dos Exemplares Que as Representam No Museu Paulista: 1a Parte, Aves Não Passeriformes e Passeriformes Não Oscines Excluída a Fam. Tyrannidae e Seguintes*; Museu Paulista: São Paulo, 1938;
2. Scherer-Neto, P. Avifauna Do Extinto Parque Nacional de 7 Quedas, Guaíra, Estado Do Paraná. *Arq. Biol. e Tecnol.* **1983**, *26*, 289–294.
3. Straube, F.C. Sobre a Distribuição Geográfica de *Macropsalis Creagra* (Bonaparte, 1850) No Estado Do Paraná. *Sulórnis* **1989**, *10*, 12–21.
4. Anjos, L. dos Distribuição de Aves Em Uma Floresta de Araucária Da Cidade de Curitiba. *Acta Biológica Parana.* **1990**, *19*, 51–63.
5. Straube, F.C. Conservação de Aves No Litoral-Sul Do Estado Do Paraná (Brasil). *Arq. Biol. e Tecnol.* **1990**, *33*, 159–173.
6. Bornschein, M.R.; Reinert, B.L.; Pichorim, M. Notas Sobre Algumas Aves Novas Ou Pouco Conhecidas No Sul Do Brasil. *Ararajuba* **1997**, *5*, 53–59.
7. Bornschein, M.R.; Reinert, B.L.; Pichorim, M. Descrição, Ecologia e Conservação de Um Novo *Scytalopus* (Rhinocryptidae) Do Sul Do Brasil, Com Comentários Sobre a Morfologia Da Família. *Ararajuba* **1998**, *6*, 3–36.
8. Anjos, L.; Boçon, R. Bird Communities in Natural Forest Patches in Southern Brazil. *Wilson Bull.* **1999**, *111*, 397–414.
9. Straube, F.C. Notas Sobre a Distribuição de *Eleothreptus Anomalus* (Gould, 1837) e *Caprimulgus Longirostris* Bonaparte, 1825 No Brasil (Aves; Caprimulgidae). *Acta Biol. Leopoldensia* **1990**, *12*, 301–3012.
10. Moraes, V.S. Avifauna Da Ilha Do Mel, Litoral Do Paraná. *Arq. Biol. e Tecnol.* **1991**, *34*, 195–205.
11. Anjos, L.; Graf, V. Riqueza de Aves Da Fazenda Santa Rita, Região Dos Campos Gerais, Palmeira, Paraná, Brasil. *Rev. Bras. Zool.* **1993**, *10*, 673–693.
12. Scherer-Neto, P.; Anjos, L.; Straube, F.C. Avifauna Do Parque Estadual de Vila Velha, Estado Do Paraná. *Arq. Biol. e Tecnol.* **1994**, *37*, 223–229.
13. Bornschein, M.R.; Reinert, B.L.; Boçon, R. A New Record of the Sickie-Winged Nightjar *Eleothreptus Anomalus* for Southern Brazil. *Bull. Br. Ornithol. Club* **1996**, *116*, 125–126.
14. Straube, F.C.; Bornschein, M.R.; Scherer-Neto, P. Coletânea Da Avifauna Da Região Noroeste Do Estado Do Paraná a Áreas Limítrofes (Brasil). *Arq. Biol. e Tecnol.* **1996**, *39*, 193–214.
15. Abe, L.M. Estudo Da Avifauna Em Remanescentes Florestais Contíguos a Reflorestamentos Com *Pinus Elliottii* Engelm, 1880. *Estud. Biol.* **1997**, *41*, 37–60.
16. Anjos, L.; Schuchmann, K.L. Biogeographical Affinities of the Avifauna of the Tibagi River Basin, Paraná

- Drainage System, Southern Brazil. *Ecotropica* **1997**, *3*, 43–65.
17. Bornschein, M.R.; Reinert, B.L. Aves de Três Remanescentes Florestais Do Norte Do Estado Do Paraná, Sul Do Brasil, Com Sugestões Para a Conservação e Manejo. *Rev. Bras. Zool.* **2000**, *17*, 615–636, doi:10.1590/S0101-81752000000300008.
  18. Gimenes, M.R.; Anjos, L. dos Distribuição Espacial de Aves Em Um Fragmento Florestal Do Campus Da Universidade Estadual de Londrina, Norte Do Paraná, Brasil. *Rev. Bras. Zool.* **2000**, *17*, 263–271, doi:10.1590/S0101-81752000000100023.
  19. Straube, F.C.; Krul, R.; Carrano, E. Coletânea Da Avifauna Da Região Sul Do Estado Do Paraná (Brasil). *Atualidades Ornitológicas* **2005**, *125*, 10–80.
  20. Straube, F.C.; Urben-Filho, A. Observações Sobre a Avifauna de Pequenos Remanescentes Florestais Na Região Noroeste Do Paraná (Brasil). *Atualidades Ornitológicas* **2005**, *123*, 10–22.
  21. Straube, F.C.; Urben-Filho, A.; Gatto, C. A Avifauna Do Parque Estadual Do Cerrado (Jaguariaíva, Paraná) e a Conservação Do Cerrado Em Seu Limite Meridional de Ocorrência. *Atualidades Ornitológicas* **2005**, *127*, 29–50.
  22. Lopes, E. V.; Anjos, L. dos A Composição Da Avifauna Do Campus Da Universidade Estadual de Londrina, Norte Do Paraná, Brasil. *Rev. Bras. Zool.* **2006**, *23*, 145–156, doi:10.1590/S0101-81752006000100006.
  23. Mestre, L.A.M.; Krul, R.; Moraes, V. dos S. Mangrove Bird Community of Paranaguá Bay - Paraná, Brazil. *Brazilian Arch. Biol. Technol.* **2007**, *50*, 75–83, doi:10.1590/S1516-89132007000100009.
  24. Santos, R.E.F. Novo Registro Documentado Do Galito *Alectrurus Tricolor* (Vieillot, 1816) Para o Estado Do Paraná, Brasil. *Atualidades Ornitológicas* **2007**, *140*, 12–13.
  25. Straube, F.C. Avifauna Da Fazenda Barra Mansa (Arapoti, Paraná) Com Anotações Sobre a Ocupação de Monoculturas de Essências Arbóreas. *Atualidades Ornitológicas* **2008**, *142*, 46–50.
  26. Straube, F.C.; Urben-Filho, A. Notas Sobre a Avifauna de Nove Localidades Na Bacia Do Rio Piquiri (Região Oeste Do Paraná, Brasil). *Atualidades Ornitológicas* **2008**, *142*, 33–37.
  27. Krügel, M.M.; Anjos, L. Bird Communities in Forest Remnants in the City of Maringá, Paraná State, Southern Brazil. *Ornitol. Neotrop.* **2000**, *11*, 315–330.
  28. Anjos, L. dos Bird Communities in Five Atlantic Forest Fragments Ins Southern Brazil. *Ornitol. Neotrop.* **2001**, *12*, 11–27.
  29. Hinkelmann, C.; Fiebig, J. An Early Contribution to the Avifauna of Paraná, Brazil. The Arkady Fiedler Expedition of 1928/29. *Bull. Br. Ornithol. Club* **2001**, *121*, 116–127.
  30. Amaral, C.; Amaral, V. Avifauna Do Vivat Floresta Sistemas Ecológicos, Tijucas Do Sul e Agudos Do Sul, Estado Do Paraná, Brasil. *Estud. Biol.* **2002**, *24*, 29–38.
  31. Pichorim, M. Biologia Reprodutiva Do Bacurau-Resoura-Gigante (*Macropsalis Forcipata*), Caprimulgidae) No Morro Anhangava, Paraná, Sul Do Brasil. *Ararajuba* **2002**, *10*, 149–165.
  32. Straube, F.C. Avifauna Da Área Especial de Interesse Turístico Do Marumbi (Paraná, Brasil). *Atualidades Ornitológicas* **2003**, *113*, 12–22.
  33. Gimenes, M.R.; Anjos, L. Spatial Distribution of Birds on Three Islands in the Upper River Paraná, Southern Brazil. *Ornitol. Neotrop.* **2004**, *15*, 71–86.
  34. Straube, F.C.; Urben-Filho, A.; Cândido Jr, J.F. Novas Informações Sobre a Avifauna Do Parque Nacional Do Iguaçu (Paraná). *Atualidades Ornitológicas* **2004**, *120*, 10–27.
  35. Philippsen, J.S.; Benedito, E.; Zawadzki, C.H. Species Composition and Richness of Avifauna in an Urban Area of Southern Brazil. *Acta Sci. Biol. Sci.* **2010**, *32*, 55–62, doi:10.4025/actascibiolsoci.v32i1.6118.
  36. Forcato, A.; Shiozawa, M.M.; Saridakis, D.P.; Tozato, H.C. Avifauna Da Universidade Norte Do Paraná, Campus

- Arapongas, PR, Brasil. *UNOPAR Científica. Ciências Biológicas e da Saúde* **2011**, *13*, 157–162, doi:10.17921/2447-8938.2011v13n3p%25p.
37. Vogel, H.F.; Campos, J.B.; Bechara, F.C. Early Bird Assemblages under Different Subtropical Forest Restoration Strategies in Brazil: Passive, Nucleation and High Diversity Plantation. *Trop. Conserv. Sci.* **2015**, *8*, 912–939, doi:10.1177/194008291500800404.
  38. Carvalho, B.H.G.; Bichinski, T.A.T.; Foerster, N.E.; Bazilio, S.; Cocha, C. Avifauna Da Floresta Nacional de Pirai Do Sul (Paraná, Sul Do Brasil). *Atualidades Ornitológicas* **2016**, *192*, 41–49.
  39. Santos Junior, P.C.A.; Marques, F.C.; Lima, M.R.; dos Anjos, L. The Importance of Restoration Areas to Conserve Bird Species in a Highly Fragmented Atlantic Forest Landscape. *Nat. Conserv.* **2016**, *14*, 1–7, doi:10.1016/j.ncon.2016.03.001.
  40. Hasui, É.; Metzger, J.P.; Pimentel, R.G.; Silveira, L.F.; Bovo, A.A.D.A.; Martensen, A.C.; Uezu, A.; Regolin, A.L.; Bispo, A.Â.; Gatto, C.A.F.R.; et al. ATLANTIC BIRDS: A Data Set of Bird Species from the Brazilian Atlantic Forest. *Ecology* **2018**, *99*, 497, doi:10.1002/ecy.2119.
  41. Stencel, L.; Caxambu, M. Avifauna Da RPPN Fazenda Moreira Sales, Em Goioerê e Moreira Sales, Paraná, Brasil. *Atualidades Ornitológicas* **2018**, *205*, 41–48.
  42. Rodrigues, R.C.; Hasui, É.; Assis, J.C.; Pena, J.C.C.; Muylaert, R.L.; Tonetti, V.R.; Martello, F.; Regolin, A.L.; Costa, T.V.V.D.; Pichorim, M.; et al. ATLANTIC BIRD TRAITS: A Data Set of Bird Morphological Traits from the Atlantic Forests of South America. *Ecology* **2019**, *100*, e02647, doi:10.1002/ecy.2647.
  43. Santos, C.S.; Pie, M.R.; da Rocha, T.C.; Navarro-Silva, M.A. Molecular Identification of Blood Meals in Mosquitoes (Diptera, Culicidae) in Urban and Forested Habitats in Southern Brazil. *PLoS One* **2019**, *14*, e0212517, doi:10.1371/journal.pone.0212517.
  44. Scherer Neto, P.; Bispo, A.A. Avifauna Do Parque Estadual de Vila Rica Do Espírito Santo, Fênix, Paraná. *Biota Neotrop.* **2011**, *11*, 317–329, doi:10.1590/S1676-06032011000300026.
  45. Scherer-Neto, P.; Klemann Junior, L.; De La Torre, G.M.; Amorin, R.; Carrano, E. Atualização Do Conhecimento Sobre a Avifauna Do Parque Estadual Do Guartelá, Paraná, Brasil. In *Coletâneas de Pesquisas - Parques Estaduais: Vila Velha, Cerrado e Guartelá*; Carpanezzi, O.T.B., Campos, J.B., Eds.; IAP: Curitiba, 2011; pp. 346–355.
  46. Scherer-Neto, P.; Klemann Junior, L.; De La Torre, G.M.; Amorin, R.; Carrano, E. Inventários Da Avifauna Do Parque Estadual de Vila Velha, Uma Atualização Do Conhecimento. In *Coletâneas de Pesquisas. Parques Estaduais de Vila Velha, Cerrado e Guartelá*; Carpanezzi, O.T.B., Campos, J.B., Eds.; IAP: Curitiba, 2011; pp. 75–84.
  47. Vogel, H.F.; Metri, R.; Zawadzki, C.H.; Moura, M.O. Avifauna from a Campus of Universidade Estadual Do Centro-Oeste, Guarapuava, Paraná State, Brazil. *Acta Sci. Biol. Sci.* **2011**, *33*, 197–207, doi:10.4025/actascibiols.v33i2.7710.
  48. Amorim, R.R.; Scherer-Neto, P.; Bosa, C.R.; Abilhoa, V. Avifauna Do Parque Estadual Do Pico Paraná e Áreas Adjacentes, Sul Do Brasil. *Nat. line* **2012**, *10*, 118–125.
  49. Straube, F. *Ruínas e Urubus: História Da Ornitologia No Paraná. Período de Natterer 1 (1820-1834)*; Hori Cadernos Técnicos: Curitiba, 2012; Vol. 5;.
  50. Straube, F.C.; Vallejos, M.A. V; Deconto, L.R.; Urben Filho, A. *IPAVE – 2012: Inventário Participativo Das Aves Do Paraná*; 1st ed.; Hori Consultoria Ambiental: Curitiba, 2012;
  51. Straube, F.C. *Ruínas e Urubus: História Da Ornitologia No Paraná. Período de Chrostowski, 1 (1901 a 1909)*; Hori Consultoria Ambiental: Curitiba, 2015;
  52. Straube, F.C. *Ruínas e Urubus: História Da Ornitologia No Paraná. Período de Mayer, 1 (1931 a 1939)*; 1st ed.; Hori Consultoria Ambiental: Curitiba, 2020; ISBN 978-65-00-13784-2.

53. Torezan, L.F.; Calsavara, L.C.; Bochio, G.M.; dos Anjos, L. Vulnerability of Bird Species in Highly Fragmented Forests of Southern Brazil: Implications for Conservation. *Ornithol. Res.* **2020**, *28*, 233–240, doi:10.1007/s43388-020-00029-8.
54. de Araújo, C.B.; Jardim, M.; Saturnino, N. dos S.F.; Rosa, G.M.; Lima, M.R.; dos Anjos, L. The Optimal Listening Period for an Effective Assessment of Bird Richness and Composition: A Case Study of Neotropical Forest. *J. Ornithol.* **2021**, *162*, 303–306, doi:10.1007/s10336-020-01812-6.
55. Lima, S.; Lima, S.; Piccoli, R. Preliminary Survey of Avifauna in a Remnant of the Atlantic Forest in the Municipality of Jesuítas – PR, Brazil. *Unisanta Biosci.* **2021**, *10*, 174–184.
56. Quagliato, I.S.; Cavarzere, V. An Ornithological Inventory in a Reforested Woodlot in Western Paraná State, Southern Brazil. *Pap. Avulsos Zool.* **2021**, *61*, e20216130, doi:10.11606/1807-0205/2021.61.30.

## Section S2

Caprimulgid species and the number of localities mentioned in the literature (Lit.) and citizen science (Cit. Sci.) data. Reference numbers are according to Section S1.

| Species                           | References                                                                                                          | Lit. | Cit. Sci. |
|-----------------------------------|---------------------------------------------------------------------------------------------------------------------|------|-----------|
| <i>Nyctiphrynus ocellatus</i>     | 39,40                                                                                                               | 1    | 34        |
| <i>Antrostomus rufus</i>          | 14,16,40,46                                                                                                         | 3    | 9         |
| <i>Antrostomus sericocaudatus</i> | 34,40,52                                                                                                            | 1    | 48        |
| <i>Lurocalis semitorquatus</i>    | 2,4,5,8,11,12,14,15,16,17,19,20,22,23,26,28,32,34,38,39,40,<br>44,45,46,49,50,53,54,56                              | 45   | 312       |
| <i>Nyctidromus albicollis</i>     | 1,5,11,14,16,17,18,19,20,21,22,23,25,26,27,30,32,33,34,35,36<br>,37,38,39,40,41,42,43,44,45,46,48,50,51,53,54,55,56 | 62   | 496       |
| <i>Hydropsalis parvula</i>        | 11,14,16,25,26,33,38,40,45,46,49,50,56                                                                              | 14   | 106       |
| <i>Hydropsalis anomala</i>        | 7,9,13,24,42,46,49,50                                                                                               | 1    | 39        |
| <i>Hydropsalis longirostris</i>   | 32,38,40,45,46,48,50                                                                                                | 7    | 42        |
| <i>Hydropsalis maculicaudus</i>   | -                                                                                                                   | -    | 1         |
| <i>Hydropsalis torquata</i>       | 16,19,21,30,40,42,44,45,50                                                                                          | 14   | 77        |
| <i>Hydropsalis forcipata</i>      | 3,5,10,11,19,20,29,31,32,38,40,44,45,46,48,50                                                                       | 37   | 88        |
| <i>Podager nacunda</i>            | 11,12,14,19,20,29,32,40,42,46,47,49,56                                                                              | 15   | 141       |
| <i>Chordeiles minor</i>           | 19,22,40                                                                                                            | 2    | 25        |
| <i>Chordeiles acutipennis</i>     | 6,16,23,40,43                                                                                                       | 3    | 7         |
| <b>TOTAL</b>                      |                                                                                                                     | 195  | 876       |
